# Supplementary material
Source: ML conference proceedings conference paper supplement (https://proceedings.neurips.cc/paper_files/paper/2022/hash/bac4d92b3f6decfe47eab9a5893dd1f6-Abstract.html)
Supplement: Supplementary file 1 [file bac4d92b3f6decfe47eab9a5893dd1f6-Supplemental-Conference.pdf]

---

# Appendix

---

## Haris Aziz

Computer Science and Engineering  
UNSW Sydney  
Sydney NSW 2052, Australia  
haris.aziz@unsw.edu.au

## Alexander Lam

Computer Science and Engineering  
UNSW Sydney  
Sydney NSW 2052, Australia  
alexander.lam1@unsw.edu.au

## Mashbat Suzuki

Computer Science and Engineering  
UNSW Sydney  
Sydney NSW 2052, Australia  
mashbat.suzuki@unsw.edu.au

## Toby Walsh

Computer Science and Engineering  
UNSW Sydney  
Sydney NSW 2052, Australia  
t.walsh@unsw.edu.au

## A Proof of Proposition 1

**Proposition 1.** *No deterministic and strategyproof mechanism satisfies Strong Proportionality.*

*Proof.* For  $n = 2$ , consider the location profile with 1 agent at 0 and 1 agent at 0.5. Strong Proportionality requires that the facility be placed at 0.25. Now also consider the location profile with 1 agent at 0 and 1 agent at 1. Strong Proportionality requires that the facility be placed at 0.5. However, this means the agent at 0.5 in the first location profile can misreport their location as 1 to have the facility placed at their own location, violating strategyproofness. Thus strategyproofness and Strong Proportionality are incompatible in deterministic mechanisms.  $\square$

## B Proof of Claim 2

**Claim 2:**  $\Pr[Y_{(n+1)} = 1] = 1$  and  $\Pr[Y_{(1)} = 0] = 1$ .

*Proof of Claim 2.* We first show that  $\Pr[Y_{(n+1)} = 1] = 1$ . Suppose the contrary, that there exists  $\beta < 1$  such that  $\Pr[Y_{(n+1)} \leq \beta] > 0$ . Under the location profile  $x = (1, \dots, 1)$ , if  $f$  satisfies Proportionality in expectation we must have  $\mathbb{E}[d(x_n, f(x))] = 0$ . However, this leads to a contradiction since

$$\begin{aligned}\mathbb{E}[d(x_n, f(x))] &\geq (1 - \beta) \Pr[Y_{(n+1)} \leq \beta] \\ &> 0,\end{aligned}$$

where the first inequality follows from the fact that if  $Y_{(n+1)} \leq \beta$  then  $f(x) \leq \beta$ , and thus  $d(1, f(x)) \geq (1 - \beta)$ .

A similar, symmetric argument can be applied to show that  $\Pr[Y_{(1)} = 0] = 1$  holds.  $\square$

## C Extension of Theorem 3 to the real line $\mathbb{R}$

In this section we extend the result of Theorem 3 to the real line. We use the following theorem which characterizes strategyproof and anonymous mechanisms on the real line as Phantom mechanisms.

**Theorem 7** (Moulin (1980)). *A mechanism  $f$  on the domain  $X = \mathbb{R}$  is strategyproof and anonymous if and only if there exists  $(n+1)$  real numbers  $y_1, \dots, y_{n+1} \in \mathbb{R} \cup \{+\infty, -\infty\}$  such that*

$$f(x) = \text{med}(x_1, \dots, x_n, y_1, \dots, y_{n+1})$$

We also modify our definition of the Random Rank mechanism. Given a profile of locations  $x \in \mathbb{R}^n$ , we define

$$\text{rank}^k(x) := \text{med}(\underbrace{-\infty, \dots, -\infty}_{n-k}, x_1, \dots, x_n, \underbrace{+\infty, \dots, +\infty}_{k-1}).$$

The Random Rank mechanism on the real line then chooses  $k \in \{1, \dots, n\}$  uniformly at random and outputs  $\text{rank}^k(x)$ .

**Theorem 4.** *A mechanism on the domain  $X = \mathbb{R}$  is universally anonymous, universally truthful and Strong Proportional in expectation if and only if it is the Random Rank mechanism.*

*Proof.* ( $\implies$ ) By Theorem 7 we know that  $f$  is a probability distribution over Phantom mechanisms. For each  $i \in \{1, \dots, n+1\}$ , denote  $Y_i$  as the random variable corresponding to the location of the  $i$ 'th Phantom. Also denote  $Y_{(i)}$  as the random variable corresponding to the  $i$ 'th order statistic.

**Claim 3:**  $\Pr[Y_{(n+1)} = +\infty] = 1$  and  $\Pr[Y_{(1)} = -\infty] = 1$ .

*Proof of Claim 3.* Suppose on the contrary that there exists  $\lambda \in \mathbb{R}$  such that  $\Pr[Y_{(n+1)} \leq \lambda] > 0$ . Consider a location profile  $x = (2\lambda, \dots, 2\lambda)$ . If  $f$  satisfies Strong Proportionality in expectation then we have  $\mathbb{E}[d(x_1, f(x))] = 0$ . However, this contradicts the following

$$\begin{aligned} \mathbb{E}[d(x_1, f(x))] &\geq |2\lambda - \lambda| \Pr[Y_{(n+1)} \leq \lambda] \\ &> 0, \end{aligned}$$

where the inequality follows since if  $Y_{(n+1)} \leq \lambda$  then  $f(x) \leq \lambda$ , and thus  $d(x_1, f(x)) \geq |\lambda|$ .

A similar, symmetric argument can be used to obtain  $\Pr[Y_{(1)} = -\infty] = 1$ .  $\square$

By Claim 3 we see that only  $n-1$  Phantoms are necessary since

$$\begin{aligned} f(x) &= \text{med}(-\infty, Y_{(2)}, \dots, Y_{(n)}, x_1, \dots, x_n, +\infty) \\ &= \text{med}(Y_{(2)}, \dots, Y_{(n)}, x_1, \dots, x_n) \end{aligned}$$

For notational convenience, we relabel the remaining  $n-1$  Phantoms such that

$$f(x) = \text{med}(Y_{(1)}, \dots, Y_{(n-1)}, x_1, \dots, x_n).$$

**Claim 4:**  $\Pr[Y_{(i)} = +\infty] = \frac{i}{n}$  and  $\Pr[Y_{(i)} = -\infty] = \frac{n-i}{n}$  for each  $i \in \{1, \dots, n-1\}$ .

*Proof of Claim 4.* Using the arguments presented in Claim 1, we see that Strong Proportionality implies

$$\begin{cases} \Pr[Y_{(i)} \leq \alpha] \leq \frac{n-i}{n}, \\ \Pr[Y_{(i)} \geq \beta] \leq \frac{i}{n}, \end{cases} \quad \text{for any } \alpha < \beta, \alpha, \beta \in \mathbb{R}. \quad (1)$$

From above we see that indeed  $\Pr[Y_{(i)} = +\infty] = \frac{i}{n}$  and  $\Pr[Y_{(i)} = -\infty] = \frac{n-i}{n}$ .  $\square$

By Claim 4, we see that  $Y_{(i)} \in \{-\infty, +\infty\}$  for each  $i \in \{1, \dots, n-1\}$  and furthermore,

$$\begin{aligned} \Pr[f(x) = \text{med}(\underbrace{-\infty, \dots, -\infty}_{n-k}, \underbrace{+\infty, \dots, +\infty}_{k-1}, x_1, \dots, x_n)] \\ &= \Pr[Y_{(n-k)} = -\infty, Y_{(n-k+1)} = +\infty] \\ &= \Pr[Y_{(n-k)} = -\infty] - \Pr[Y_{(n-k+1)} = -\infty] \\ &= \frac{n - (n-k)}{n} - \frac{n - (n-k+1)}{n} \\ &= \frac{1}{n}. \end{aligned}$$

The third equality follows from the fact that for any  $i \in \{1, \dots, n\}$ , we have  $\Pr[Y_{(i)} = -\infty, Y_{(i+1)} = +\infty] + \Pr[Y_{(i)} = -\infty, Y_{(i+1)} = -\infty] = \Pr[Y_{(i)} = -\infty]$  and  $\Pr[Y_{(i)} = -\infty, Y_{(i+1)} = -\infty] = \Pr[Y_{(i+1)} = -\infty]$ .

Hence we see that  $f$  is equivalent to running  $\text{rank}^k$  mechanism for each  $k \in \{1, \dots, n\}$  with probability  $\frac{1}{n}$ . Thus indeed  $f$  is the Random Rank mechanism.

( $\Leftarrow$ ) Similar to the case when  $X = [0, 1]$ , the Random Rank mechanism is universally anonymous and universally truthful when the domain is  $X = \mathbb{R}$  as each realization of the mechanism,  $\text{rank}^k$ , is strategyproof and anonymous by Theorem 7. The proof that Random Rank satisfies Strong Proportionality in expectation is identical that in the proof of Theorem 3.  $\square$

**Remark 1.** Note that the Phantoms are random variables on the extended real line  $\mathbb{R} \cup \{+\infty, -\infty\}$ , and thus a random variable  $Y$  may satisfy  $\Pr[Y = +\infty] > 0$ . This is in contrast to random variables defined on  $\mathbb{R}$  in which every random variable  $Y$  must satisfy  $\lim_{N \rightarrow \infty} \Pr[Y \geq N] = 0$ .

## D I.I.D. Phantom Mechanisms

**Definition 1** (I.I.D Phantom Mechanism). A mechanism is an I.I.D Phantom mechanism if it is a Phantom mechanism with  $y_1 = 0$ ,  $y_{n+1} = 1$  and the remaining phantoms  $y_1, \dots, y_{n-1}$  are drawn I.I.D according to some distribution  $D$  on  $[0, 1]$

The I.I.D Phantom mechanisms are universally truthful, ex-post efficient and universally anonymous, as they only give positive support to instances of deterministic Phantom mechanisms with  $y_1 = 0$  and  $y_{n+1} = 1$ , which by Theorem 2 are strategyproof, efficient and anonymous. If the expected values of the Phantom distribution's order statistics are uniformly spaced on  $[0, 1]$ , then the mechanism also satisfies Proportionality in expectation.

**Theorem 8.** An I.I.D Phantom mechanism with distribution  $D$  satisfies Proportionality in expectation if and only if the order statistics  $D_{(i)}$  have expected value  $\mathbb{E}[D_{(i)}] = \frac{i}{n}$  for each  $i \in \{1, \dots, n-1\}$ .

*Proof.* ( $\Rightarrow$ ) Fix any  $i \in \{1, \dots, n-1\}$ . Consider a location profile  $x = (\underbrace{0, \dots, 0}_{n-i}, \underbrace{1, \dots, 1}_i)$

and let  $S^0$  be the set of agents located at 0, thus  $|S^0| = n - i$ . Denote  $D_{(i)}$  as the random variable corresponding to the location of the  $i$ 'th order statistic of the Phantoms. Since our mechanism is a Phantom mechanism the output location of the mechanism is distributed as  $D_{(i)}$ . Thus for any  $i \in S^0$  we have

$$\begin{aligned} \mathbb{E}[D_{(i)}] &= \mathbb{E}[d(0, f(x))] \\ &= \mathbb{E}[d(x_i, f(x))] \\ &\leq \frac{n - |S^0|}{n} \\ &= \frac{i}{n} \end{aligned}$$

where the second last equality holds since  $f$  satisfies Proportionality in expectation. Similarly let  $S^1$  be the set of agents located at 1, and thus  $|S^1| = i$ . For  $j \in S^1$ , by proportionality in expectation we see that

$$\begin{aligned} \mathbb{E}[d(x_j, f(x))] &= \mathbb{E}[d(1, f(x))] \\ &\leq \frac{n - |S^1|}{n} \\ &= \frac{n - i}{n} \end{aligned}$$

Since  $\mathbb{E}[d(1, f(x))] = 1 - \mathbb{E}[D_{(i)}]$ , by rearranging above we see that  $\mathbb{E}[D_{(i)}] \geq \frac{i}{n}$ . Hence indeed  $\mathbb{E}[D_{(i)}] = \frac{i}{n}$  for each  $i \in \{1, \dots, n-1\}$  as needed to show.

( $\Leftarrow$ ) For any  $x \in \{0, 1\}^n$ , let  $S^0$  be the set of agents located at 0 and  $S^1$  be the set of agents located at 1. Let  $|S^0| = k$  and  $|S^1| = n - k$ , the location of the facility is distributed according

to  $D_{(n-k)}$ . Hence for any  $i \in S^0$ , we have  $\mathbb{E}[d(x_i, f(x))] = \mathbb{E}[D_{(n-k)}] = \frac{n-|S^0|}{n}$ . Similarly for  $j \in S^1$ , we have  $\mathbb{E}[d(x_j, f(x))] = 1 - \mathbb{E}[D_{(n-k)}] = 1 - \frac{n-k}{n} = \frac{n-|S^1|}{n}$  as desired.  $\square$

By Theorem 8, we know that the Random Phantom mechanism is Proportional in expectation.

## E Proof of Theorem 5

**Theorem 5.** *The AverageOrRandomRank- $p$  mechanism satisfies Strong Proportionality in expectation and is strategyproof in expectation if and only if  $p \in [0, \frac{1}{2}]$ .*

*Proof.* We first show that the mechanism is Strong Proportional in expectation. Consider any location profile  $x \in \{\alpha, \beta\}^n$ , and let  $S_\alpha$  denote the set of agents at  $\alpha$  and  $S_\beta = N \setminus S_\alpha$  denote the set of agents at  $\beta$ . The AverageOrRandomRank- $p$  mechanism places the facility at:

- $\alpha$  with probability  $(1-p) \frac{|S_\alpha|}{n}$ ,
- at  $\beta$  with probability  $(1-p) \frac{|S_\beta|}{n}$ ,
- and at  $\frac{|S_\alpha|\alpha + |S_\beta|\beta}{n}$  with probability  $p$ .

For all  $i \in S_\alpha$ , we have

$$\begin{aligned} \mathbb{E}[d(x_i, f_{RR}(x))] &= (1-p) \frac{|S_\beta|}{n} (\beta - \alpha) + p \left( \frac{|S_\alpha|\alpha + |S_\beta|\beta}{n} - \alpha \right) \\ &= \frac{|S_\beta|}{n} \beta - \alpha(1-p) \frac{|S_\beta|}{n} + p\alpha \frac{|S_\alpha| - n}{n} \\ &= \frac{|S_\beta|}{n} (\beta - \alpha) = \frac{n - |S_\alpha|}{n} (\beta - \alpha), \end{aligned}$$

and for all  $j \in S_\beta$ , we have

$$\begin{aligned} \mathbb{E}[d(x_j, f_{RR}(x))] &= (1-p) \frac{|S_\alpha|}{n} (\beta - \alpha) + p \left( \beta - \frac{|S_\alpha|\alpha + |S_\beta|\beta}{n} \right) \\ &= -\frac{|S_\alpha|}{n} \alpha + \beta(1-p) \frac{|S_\alpha|}{n} + p\beta \frac{n - |S_\beta|}{n} \\ &= \frac{|S_\alpha|}{n} (\beta - \alpha) = \frac{n - |S_\beta|}{n} (\beta - \alpha). \end{aligned}$$

Hence, AverageOrRandomRank- $p$  satisfies Strong Proportionality in expectation.

We now show that the mechanism is strategyproof in expectation. Suppose an agent at  $x_i$  deviates by distance  $d$  to attain a better expected distance. Its expected cost is reduced by  $\frac{dp}{n}$  from the average location moving closer, but is also increased by  $\frac{d(1-p)}{n}$  from its reported location moving away. For strategyproofness we require that  $\frac{d(1-p)}{n} \geq \frac{dp}{n}$ , which is satisfied for  $p \in [0, \frac{1}{2}]$ . Furthermore, it is easy to see that if  $p > \frac{1}{2}$ , an agent can improve its expected distance from the facility by misreporting its location.  $\square$

## F Proof of Theorem 6

**Theorem 6.** *A mechanism is universally anonymous, universally truthful and SPF in expectation if and only if it is the Random Rank mechanism.*

*Proof.* Since SPF implies Strong Proportionality, by Theorem 3 it suffices to prove Random Rank satisfies SPF. Consider any location profile  $x$  within range  $R$  and subset of agents  $S \subseteq N$  within

range  $r$ . Denote  $X_S$  as the event that Random Rank places the facility at an agent in  $S$ . Then for any  $i \in S$ , we have

$$\begin{aligned}
\mathbb{E}[d(x_i, f(x))] &\leq R(1 - \Pr[X_S]) + r \Pr[X_S] \\
&\leq R \left( \frac{n - |S|}{n} \right) + r \frac{|S|}{n} \\
&\leq R \left( \frac{n - |S|}{n} \right) + r.
\end{aligned}$$

□
